# Supplementary material
Source: PubMed Central journal article supplement (PMC5739520)
Supplement: NIHMS919397-supplement.pdf [file NIHMS919397-supplement.pdf]

**Appendix**  
**Social Policy Expenditures and Life Expectancy in High-Income Countries**  
**Reynolds and Avendano**

**Appendix Figure 1.** Social expenditures as a percentage of GDP by country and year, OECD countries, 1980–2010.

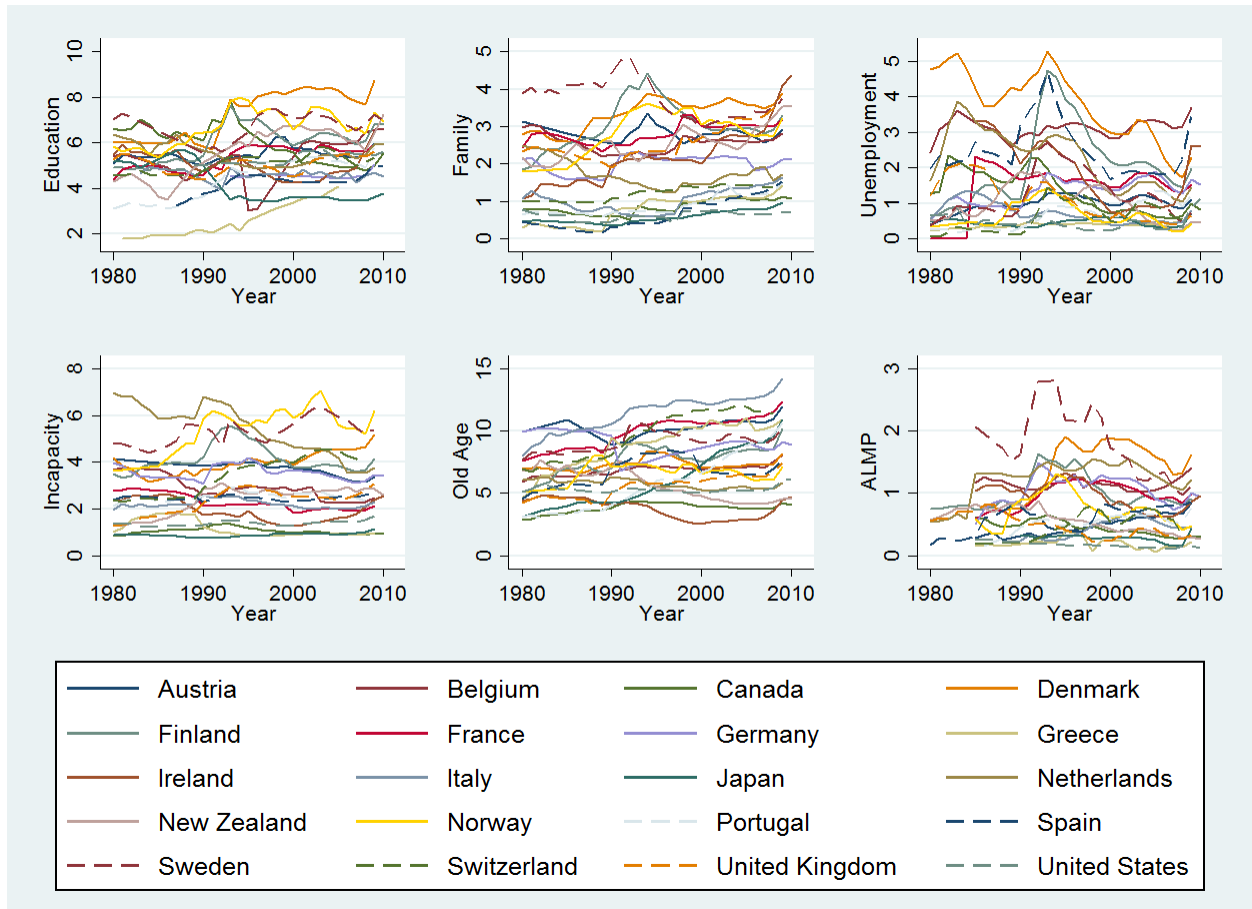

OECD, Organisation of Economic Co-operation and Development; GDP, gross domestic product

**Appendix**  
**Social Policy Expenditures and Life Expectancy in High-Income Countries**  
**Reynolds and Avendano**

**Appendix Table 1.** Fixed Effects Models of Life Expectancy on Lagged Social Expenditures Under Different Samples, OECD Countries, 1980–2010

| Variable            | Excluding U.S. |               | Excluding Greece, Portugal, Spain |               | Public only |                | Demographic variables |               |
|---------------------|----------------|---------------|-----------------------------------|---------------|-------------|----------------|-----------------------|---------------|
|                     | $\beta$        | 95% CI        | $\beta$                           | 95% CI        | $\beta$     | 95% CI         | $\beta$               | 95% CI        |
| Education           | 0.154          | 0.023, 0.285  | 0.160                             | 0.037, 0.284  | 0.160       | 0.032, 0.288   | 0.149                 | 0.023, 0.274  |
| Family              | -0.070         | -0.333, 0.193 | -0.102                            | -0.362, 0.158 | -0.040      | -0.302, -0.222 | -0.105                | -0.366, 0.156 |
| Unemployment        | 0.063          | -0.126, 0.252 | -0.005                            | -0.223, 0.212 | 0.033       | -0.155, -0.220 | 0.047                 | -0.136, 0.231 |
| Incapacity          | 0.176          | 0.011, 0.342  | 0.158                             | -0.006, 0.322 | 0.169       | -0.023, -0.360 | 0.144                 | -0.017, 0.305 |
| Old age             | -0.091         | -0.210, 0.028 | -0.082                            | -0.215, 0.051 | -0.102      | -0.220, -0.016 | -0.094                | -0.210, 0.022 |
| ALMP                | 0.155          | -0.165, 0.474 | 0.066                             | -0.264, 0.397 | 0.141       | -0.177, -0.459 | 0.097                 | -0.210, 0.404 |
| Observations        | 207            |               | 193                               |               | 224         |                | 220                   |               |
| Number of countries | 19             |               | 17                                |               | 20          |                | 20                    |               |

*Notes:* Estimate unit is years of life expectancy.

OECD, Organisation of Economic Co-operation and Development; ALMP, active labor market programs
